# Supplementary material for: A geographical and seasonal comparison of nitrogen uptake by phytoplankton in the Southern Ocean
Source: Copernicus journal article supplement (doi:10.5194/os-11-251-2015), 2015-03-13
Supplement: Supplementary file 1 [file supplementary_material.pdf › Supplementary Info/supplementary_material.pdf]

# Supplementary material

February 25, 2015

## **1 Cruise track for the winter cruise**

The positions of the CTD stations are shown in figure 1. Figures ?? and ?? show the hydrographic data for the winter cruise. During leg 2, sampling was carried out from the ice edge to Marion Island in a straight line and then around the island in an anti-clockwise direction. The profiles for leg 2 are shown by station number rather than by latitude as the circular nature of the transect gives rise to overlaps in the latitude. The positions of the 15N stations where nitrogen uptake was measured are shown on the CTD plots.

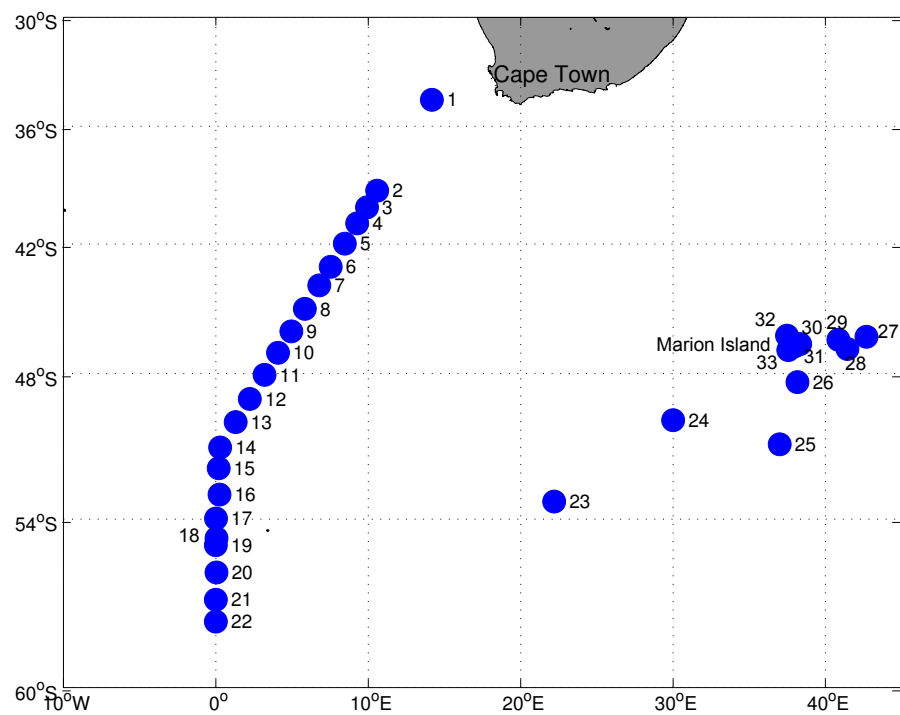

Figure 1: CTD positions for the winter cruise. The numbers represent the cruise CTD number.

## 2 Hydrographic data for the winter cruise

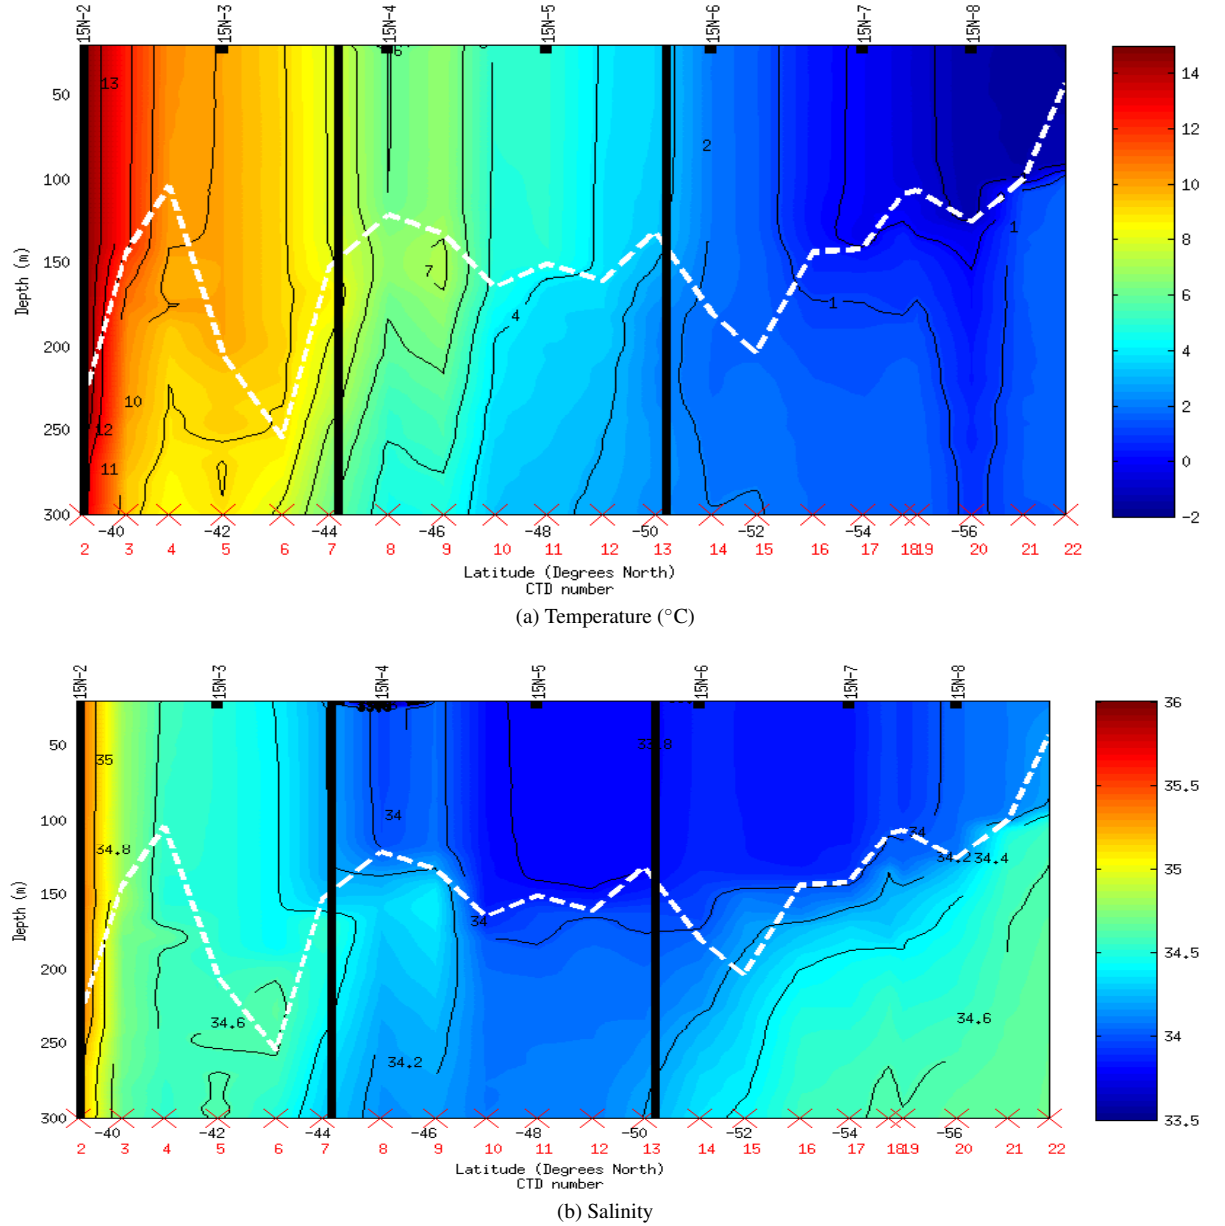

Figure 2: (a) Temperature ( $^{\circ}\text{C}$ ) and (b) Salinity (psu) sections for leg 1 of the winter cruise: (a) Temperature ( $^{\circ}\text{C}$ ) (b) (c) Chlorophyll ( $\text{mg} \cdot \text{m}^{-3}$ ) (d) Oxygen ( $\text{mL} \cdot \text{L}^{-1}$ ). The red crosses and numbers represent all the CTD stations during this leg. The stations where nitrogen uptake was measured are indicated by the black rectangles and "15N-" number at the top of each plot. The solid black lines from left to right show the positions of STF, SAF and the PF and the white dashed line shows the mixed layer depths.

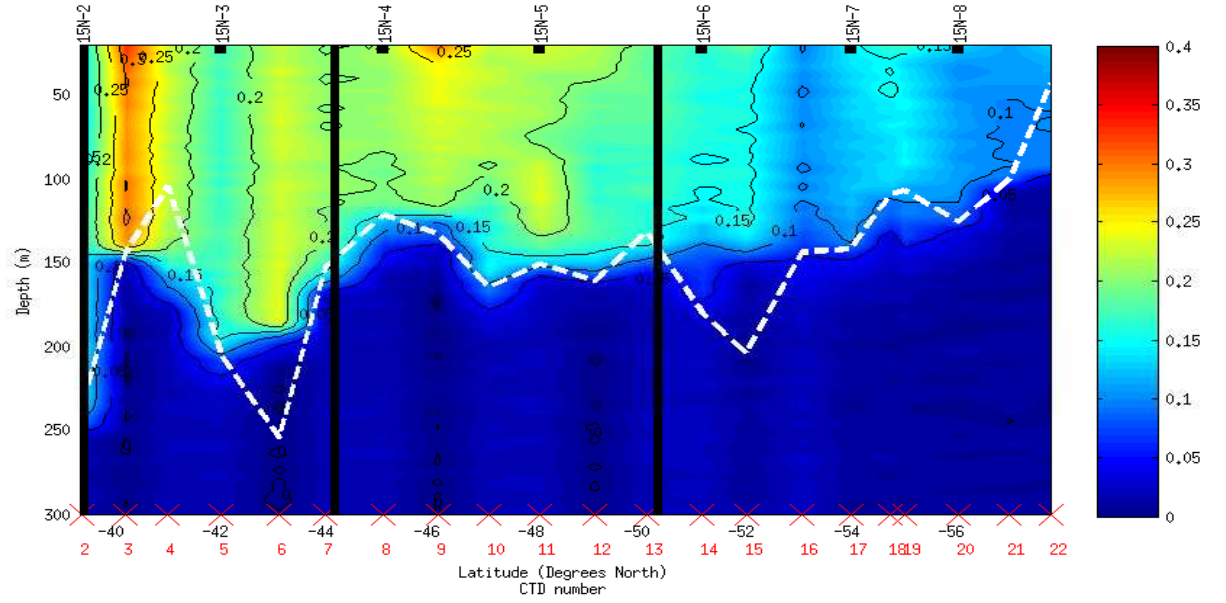

(a) Chlorophyll

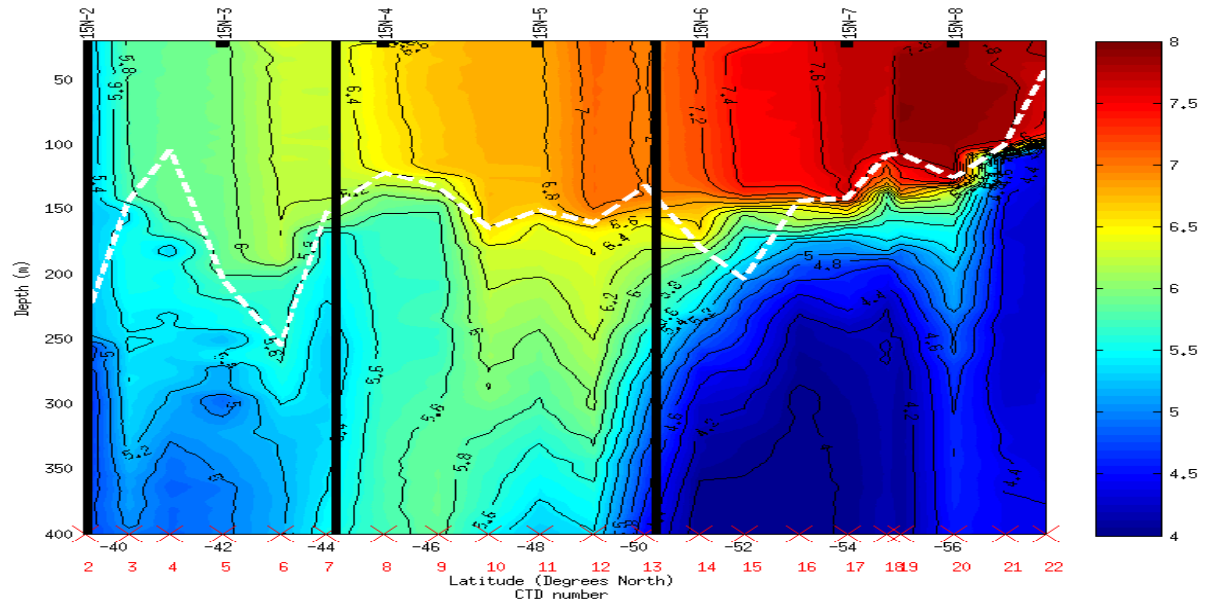

(b) Dissolved oxygen

Figure 3: (a) Chlorophyll ( $\text{mg} \cdot \text{m}^{-3}$ ) and (b) dissolved Oxygen ( $\text{mL} \cdot \text{L}^{-1}$ ) concentrations for leg 1 of the winter cruise. The red crosses and numbers represent all the CTD stations during this leg. The stations where nitrogen uptake was measured are indicated by the black rectangles and "15N-" number at the top of each plot. The solid black lines from left to right show the positions of STF, SAF and the PF and the white dashed line shows the mixed layer depths.

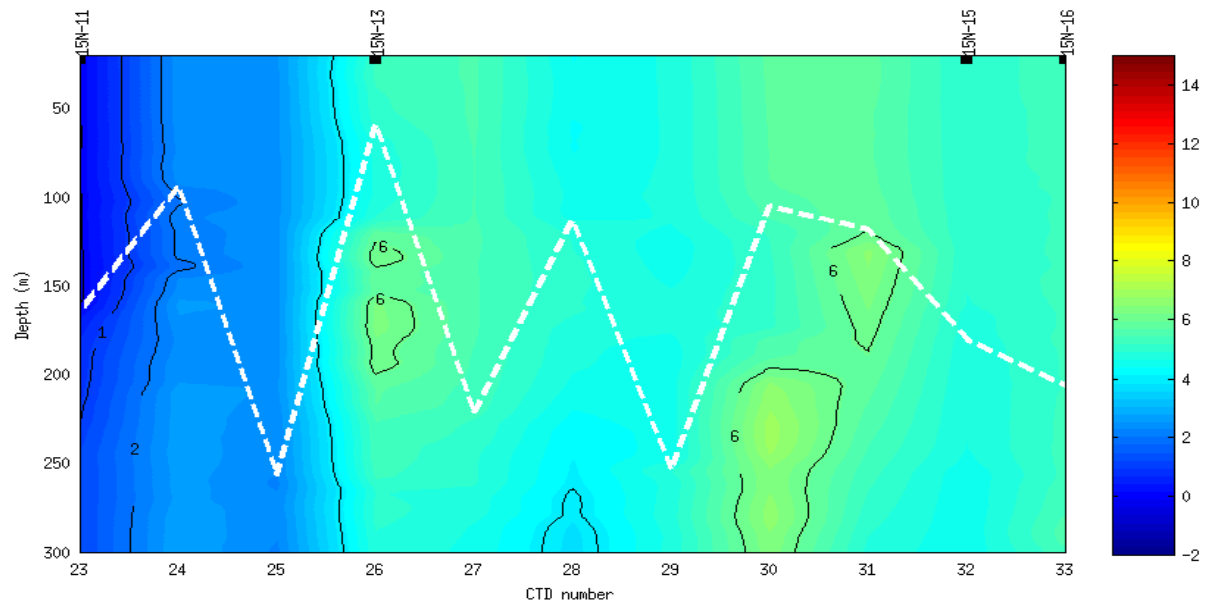

(a) Temperature ( $^{\circ}\text{C}$ )

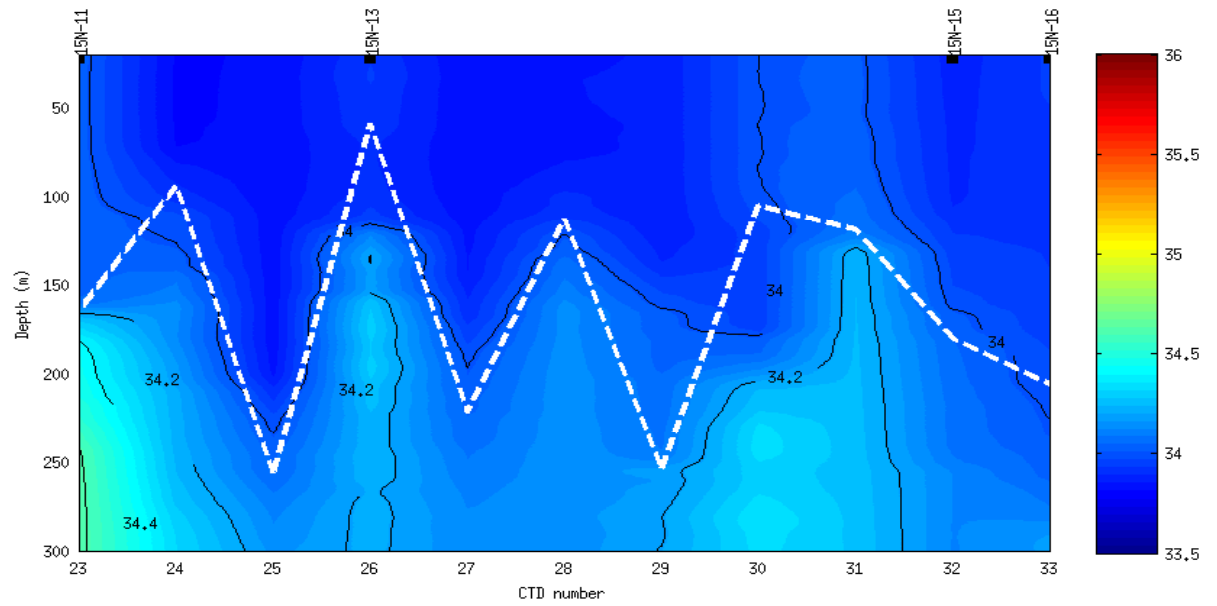

(b) Salinity

Figure 4: (a) Temperature ( $^{\circ}\text{C}$ ) and (b) Salinity (psu) data for leg 2 of the winter cruise: The profiles are shown by station number rather than by latitude there are overlaps in the latitudes due to the circular nature of this leg. The distance between the stations is not shown at scale. The white dashed line represents the mixed layer depths. The stations where nitrogen uptake was measured are indicated by the black lines and "15N-" number at the top of each plot.

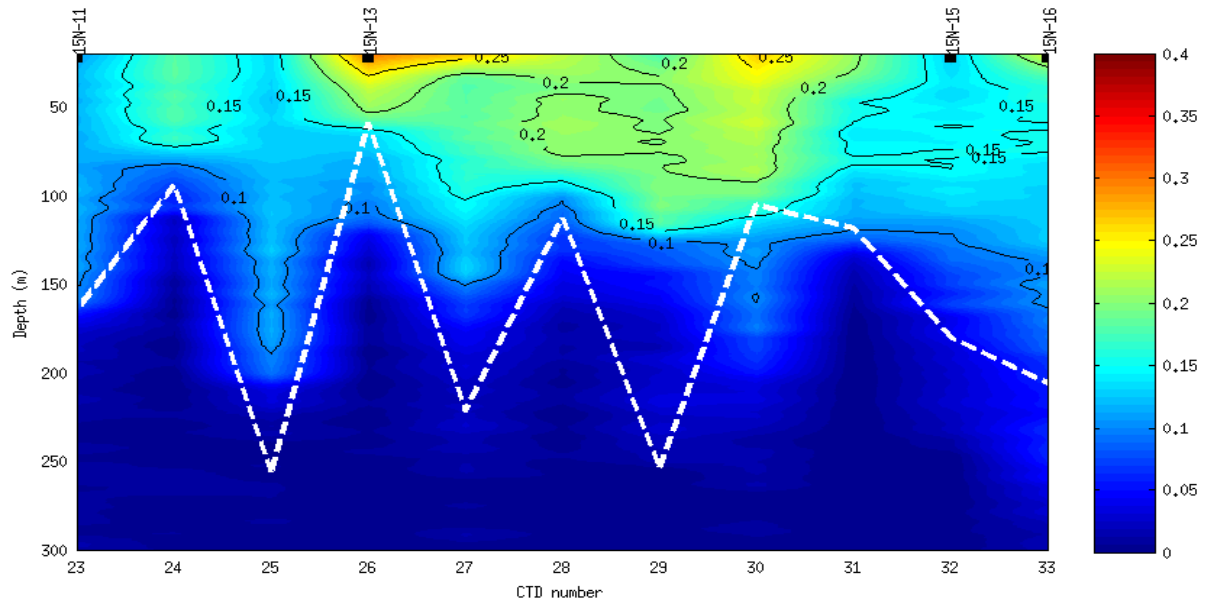

(a) Chlorophyll

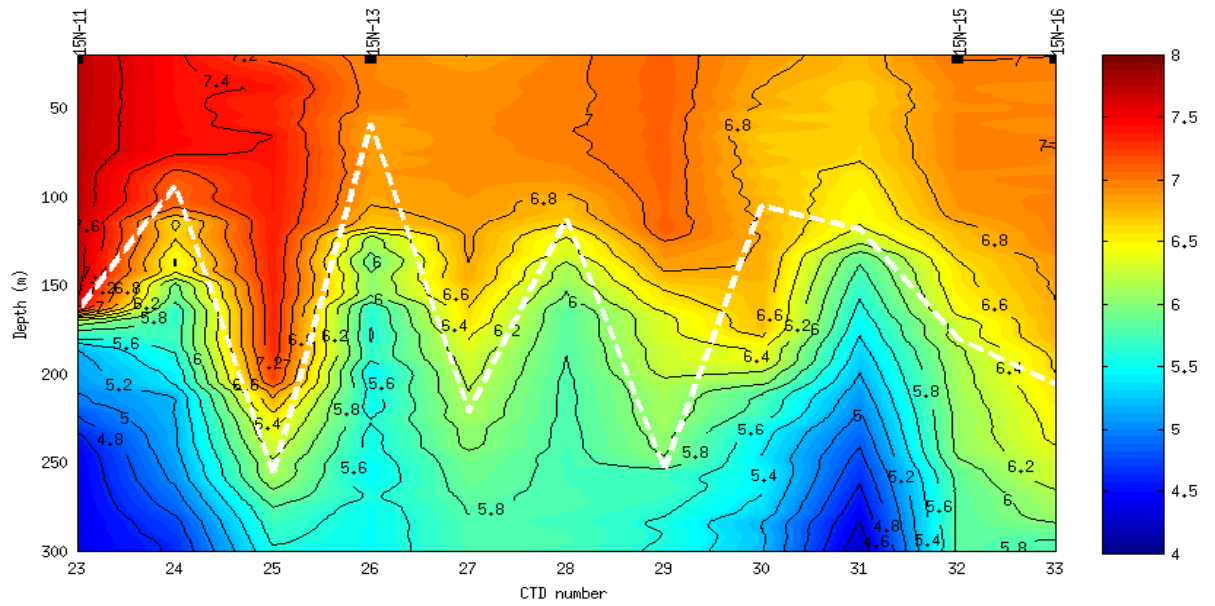

(b) Dissolved oxygen

Figure 5: (a) Chlorophyll ( $\text{mg} \cdot \text{m}^{-3}$ ) and (b) dissolved Oxygen ( $\text{mL} \cdot \text{L}^{-1}$ ) concentrations for leg 2 of the winter cruise. The profiles are shown by station number rather than by latitude there are overlaps in the latitudes due to the circular nature of this leg. The distance between the stations is not shown at scale. The white dashed line represents the mixed layer depths. The stations where nitrogen uptake was measured are indicated by the black lines and "15N-" number at the top of each plot.

### 3 Correction of nitrogen uptake rates

In this paper, nitrogen uptake rates were calculated from the equation by (Collos, 1987). However, these do not account for isotopic dilution (specially for ammonium uptake rates) nor for the high tracer enrichment at some stations. Figure 6 compares ammonium uptake rates corrected for isotopic dilution according to the equation by (Kanda et al., 1987). Figure 7 compares all the nitrogen uptake rates corrected for high tracer enrichment according to the equation by Eppley et al. (1977).

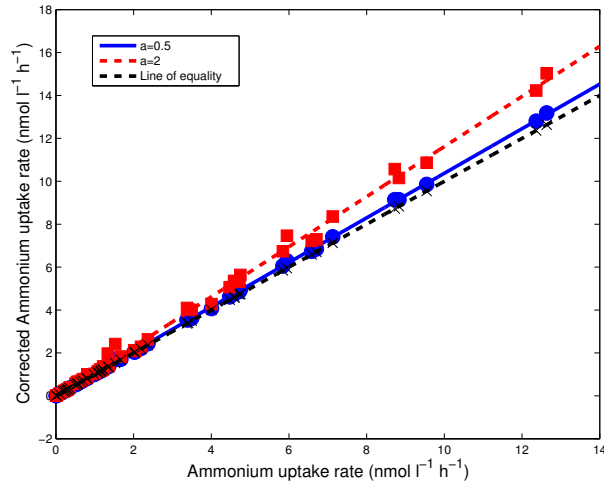

Figure 6: Comparison of uncorrected ammonium uptake rates and those corrected for isotopic dilution to the equation by Kanda et al. (1987)

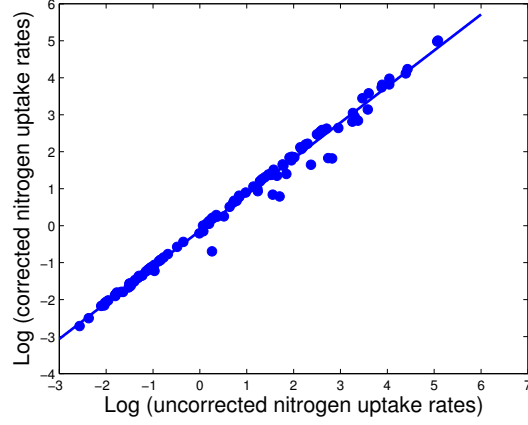

Figure 7: Comparison of uncorrected nitrogen uptake rates and those corrected for large enrichments according to the equation by Eppley et al. (1977)

## 4 Comparison of integrated nitrogen uptake rates

Table 1: Overview and comparison of integrated nitrogen uptake rates,  $\rho_{\text{NO}_3}$  and  $\rho_{\text{NH}_4}$  ( $\text{mmol N m}^{-2} \text{d}^{-1}$ ). Average rates and the range are presented here

| Integrated $\rho_{\text{NO}_3}$ |              | Integrated $\rho_{\text{NH}_4}$ |              | Month    | Reference                 |
|---------------------------------|--------------|---------------------------------|--------------|----------|---------------------------|
| mean                            | range        | mean                            | range        |          |                           |
| 0.20                            | 0.10–0.38    | 4.39                            | 1.12 – 9.05  | March    | this study                |
| 1.14                            | 0.17–5.20    | 6.73                            | 0.60 – 32.86 | July     | this study                |
| 3.01                            | 1.75 – 6.58  | 1.06                            | 0.55 – 2.18  | March    | Smith and Nelson (1990)   |
| 3.33                            | 0.79 – 8.63  | 14.58                           | 2.65 – 39.17 | April    | Thomalla et al. (2011)    |
| 1.49                            | 0.82 – 2.48  | 3.68                            | 0.35 – 10.55 | February | Sambrotto and Mace (2000) |
| 4.37                            | 1.32 – 8.86  | 2.34                            | 1.62–2.91    | October  | Savoye et al. (2004)      |
| 5.25                            | 1.85 – 9.26  | 4.63                            | 1.51– 10.06  | November | Smith and Nelson (1990)   |
| 10.43                           | 0.9 – 34.94  | 12.63                           | 2.84 – 23.19 | November | Waldron et al. (1995)     |
| 6.10                            | 1.90 – 12.58 | 5.65                            | 3.03 – 8.80  | December | Sambrotto and Mace (2000) |
| 1.50                            | 0.3 – 4.1    | 1.1                             | 0.8 – 1.6    | December | Gandhi et al. (2012)*     |
| 4.07                            | 3.63 – 4.55  | 1.37                            | 0.98 – 1.91  | December | Savoye et al. (2004)      |

\*values reported to 1 decimal place

## References

Collos, Y.: Calculations of  $^{15}\text{N}$  uptake rates by phytoplankton assimilating one or several nitrogen sources, International Journal of Radiation Applications and Instrumentation. Part A. Applied Radiation and Isotopes, 38, 275–282, doi:10.1016/0883-2889(87)90038-4, 1987.



- Eppley, R., Sharp, J., Renger, E., Perry, M., and Harrison, W.: Nitrogen assimilation by phytoplankton and other microorganisms in the surface waters of the central North Pacific Ocean, *Marine Biology*, 39, 111–120, doi:10.1007/BF00386996, 1977.
- Gandhi, N., Ramesh, R., Laskar, A., Sheshshayee, M., Shetye, S., Anilkumar, N., Patil, S., and Mohan, R.: Zonal variability in primary production and nitrogen uptake rates in the southwestern Indian Ocean and the Southern Ocean, *Deep-Sea Research, Part I*, 67, 32–43, doi:10.1016/j.dsr.2012.05.003, 2012.
- Kanda, J., Laws, E., Saino, T., and Hattori, A.: An evaluation of isotope dilution effect from conventional data sets of  $^{15}\text{N}$  uptake experiments, *Journal of Plankton Research*, 9, 79–90, doi:10.1093/plankt/9.1.79, 1987.
- Sambrotto, R. N. and Mace, B. J.: Coupling of biological and physical regimes across the Antarctic Polar Front as reflected by nitrogen production and recycling, *Deep-Sea Research, Part II*, 47, 3339–3367, doi:10.1016/S0967-0645(00)00071-0, 2000.
- Savoye, N., Dehairs, F., Elskens, M., Cardinal, D., Kopczyńska, E., Trull, T. W., Wright, S., Baeyens, W., and Griffiths, F. B.: Regional variation of spring N-uptake and new production in the Southern Ocean, *Geophysical Research Letters*, 31, L03 301, doi:10.1029/2003GL018946, 2004.
- Smith, Jr, W. . and Nelson, D. M.: Phytoplankton growth and new production in the Weddell Sea marginal ice zone in the austral spring and autumn, *Limnology and Oceanography*, 35, 809–821, doi:10.4319/lo.1990.35.4.0809, 1990.
- Thomalla, S. J., Waldron, H. N., Lucas, M. I., Read, J. F., Ansorge, I. J., and Pakhomov, E.: Phytoplankton distribution and nitrogen dynamics in the southwest indian subtropical gyre and Southern Ocean waters, *Ocean Science*, 7, 113–127, doi: 10.5194/os-7-113-2011, 2011.
- Waldron, H. N., Attwood, C. G., Probyn, T. A., and Lucas, M. I.: Nitrogen dynamics in the Bellingshausen Sea during the Austral spring of 1992, *Deep-Sea Research*, 42, 1253–1276, doi:10.1016/0967-0645(95)00063-V, 1995.
