# Supplementary material for: A geographical and seasonal comparison of nitrogen uptake by phytoplankton in the Southern Ocean
Source: Copernicus journal article supplement (doi:10.5194/os-11-251-2015), 2015-03-13
Supplement: Supplementary file 2 [file os-11-251-2015-supplement-cover-letter.pdf › os-11-251-2015-supplement-cover-letter.pdf]

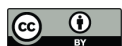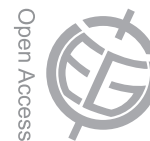

## *Supplement of*

# **A geographical and seasonal comparison of nitrogen uptake by phytoplankton in the Southern Ocean**

**R. Philibert et al.**

*Correspondence to:* R. Philibert ([raissaphilibert@gmail.com](mailto:raissaphilibert@gmail.com))

- [os-11-251-2015-supplement-cover-letter.pdf](#)
- Supplementary Info
  - [summer\\_uptake\\_Rates.csv](#)
  - [supplementary\\_material.pdf](#)
  - [uptake\\_rates\\_winter\\_uptake\\_rates.csv](#)
  - [winter\\_environmentalvariables.csv](#)
